# Supplementary material for: Overexpression of GREM1 Improves the Survival Capacity of Aged Cardiac Mesenchymal Progenitor Cells via Upregulation of the ERK/NRF2-Associated Antioxidant Signal Pathway
Source: MDPI journal article supplement (doi:10.3390/cells12081203), 2023-04-21
Supplement: s1 [file s1]

**A**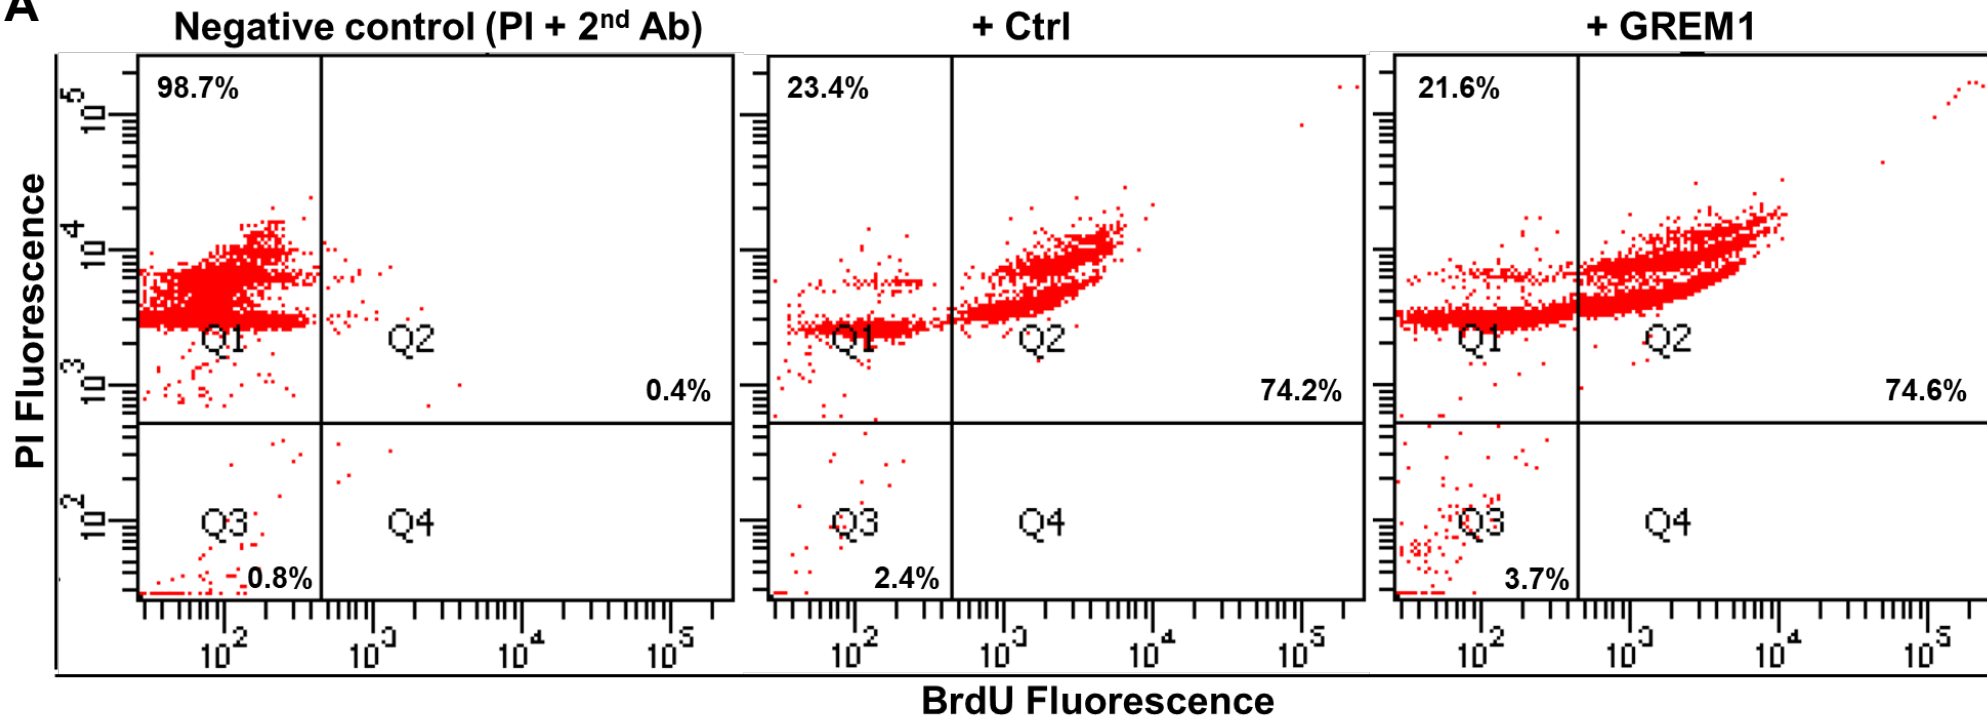**B**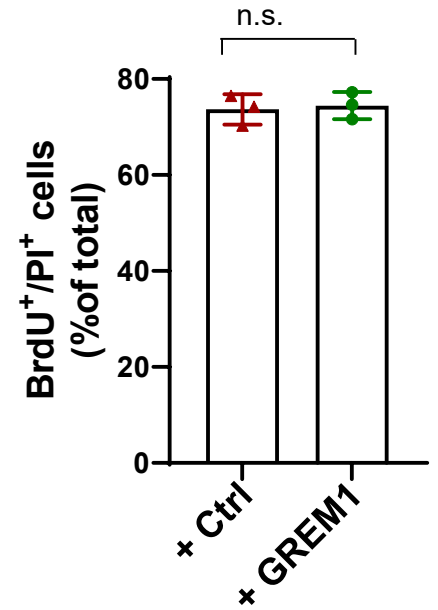

**Supplemental Figure S1. Overexpression of GREM1 in hMPCs does not alter the cells' ability to proliferate.** **A.** flow cytometry assay with BrdU and PI staining was performed to quantify the percentage of BrdU positive cells for the samples of hMPCs with or without GREM1 overexpression after 48-hour BrdU incorporation. **B.** Quantitative analysis for panel A. n.s., no significant difference.

Supplemental Figure S2. Full-length Western blot images

Figure 1B

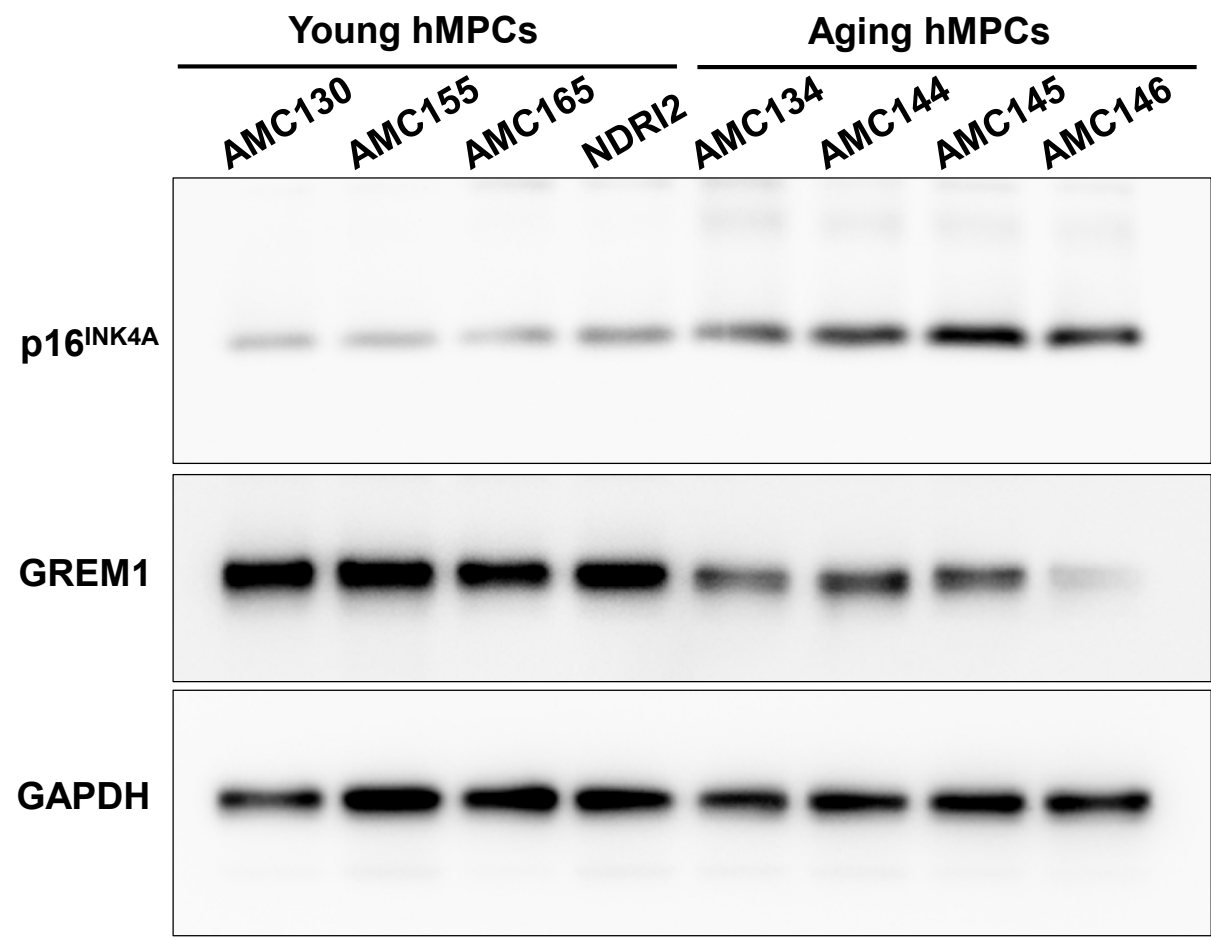

Figure 1D

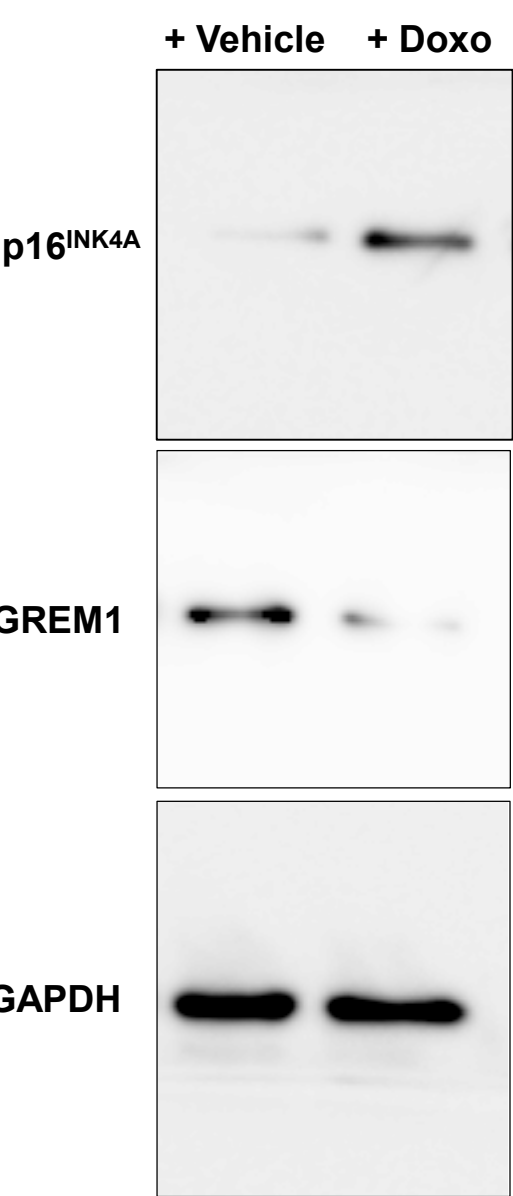

Figure 1E

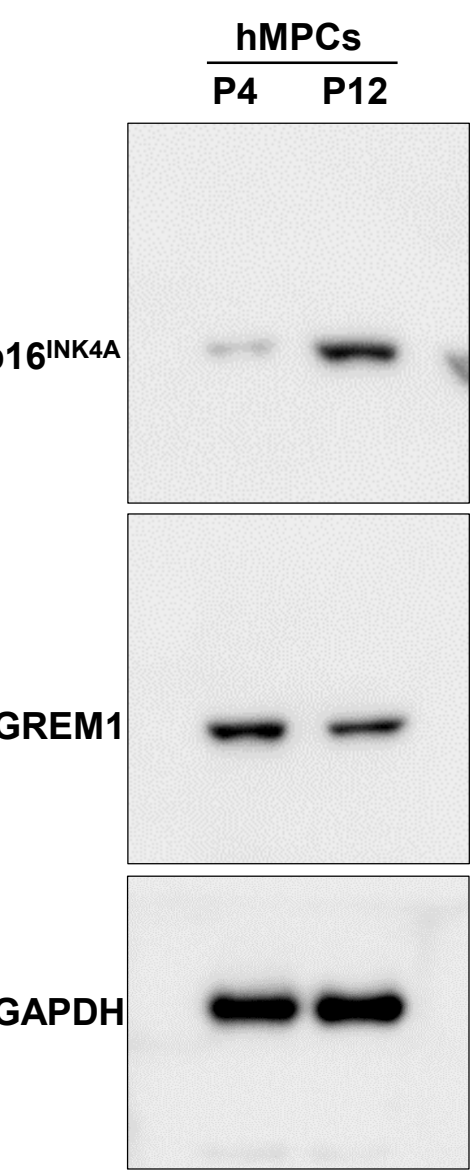

Supplemental Figure S2. full-length Western blot images (continued)

Figure 2A

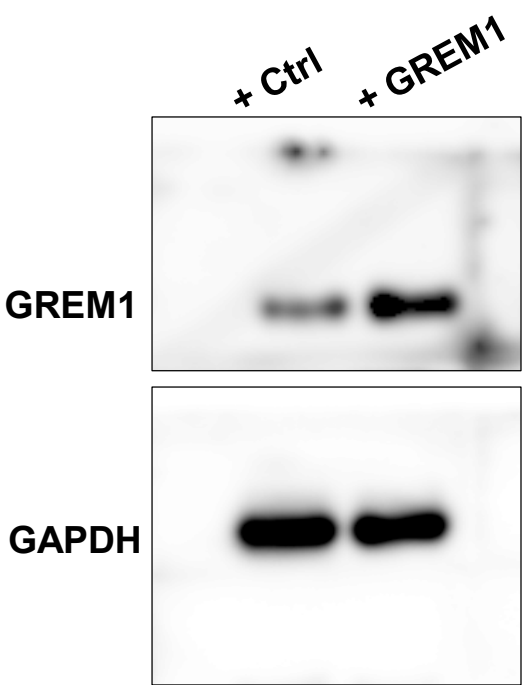

Figure 2C

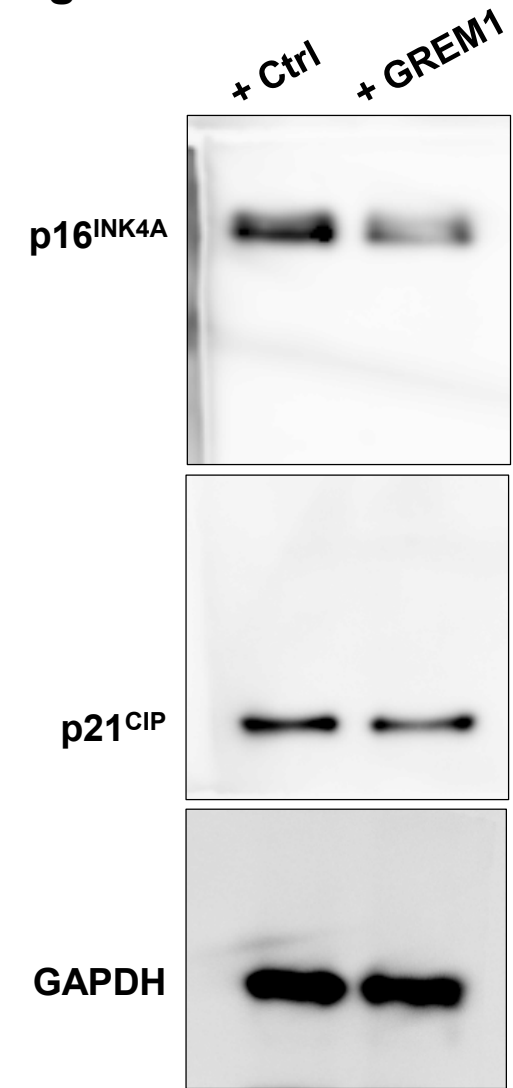

Figure 3E

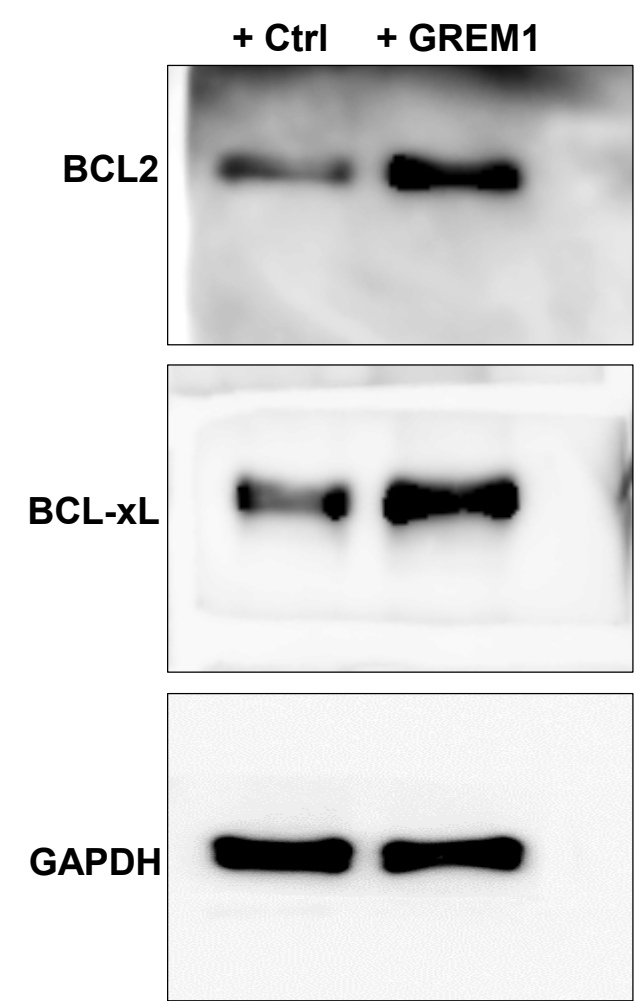

Supplemental Figure S2. full-length Western blot images (continued)

Figure 4E

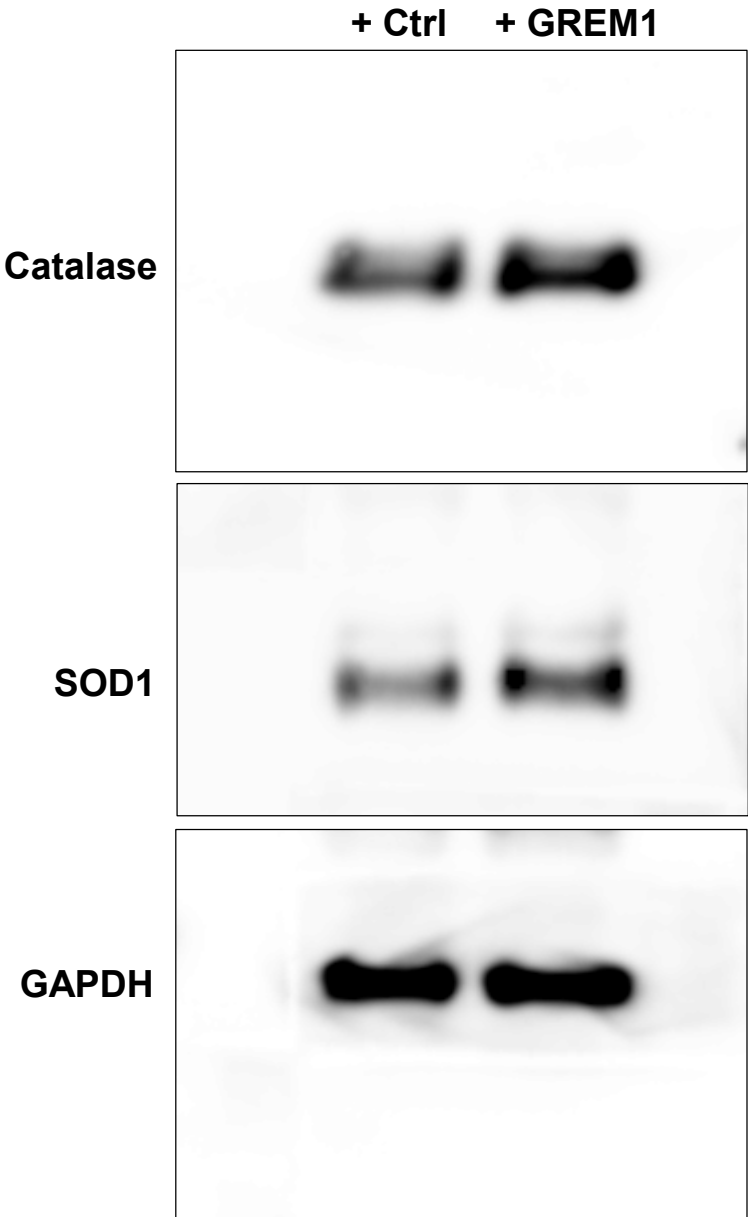

Figure 5A

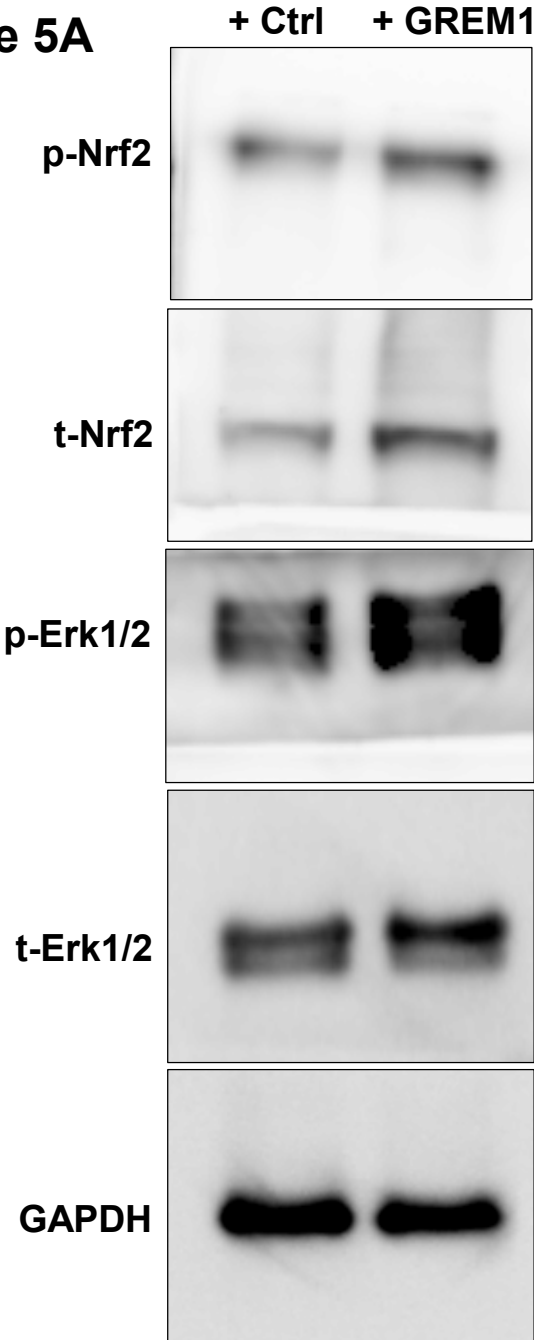

**Table S1. List of primers for human genes used for the qPCR.**

| <b>Genes</b>        | <b>Forward Primer</b>   | <b>Reverse Primer</b>   |
|---------------------|-------------------------|-------------------------|
| <b>GREM1</b>        | GCAGGATAGTGGAGTGAGAAAG  | TCAGCCTGTGTTCTGGTATTG   |
| <b>CDKN2A (p16)</b> | GCACATTCATGTGGGCATTT    | GACTCAAGAGAAGCCAGTAACC  |
| <b>CDKN1A (p21)</b> | CGGAACAAGGAGTCAGACATT   | AGTGCCAGGAAAGACAACACTAC |
| <b>FOXO1A</b>       | TCATGTCAACCTATGGCAG     | CATGGTGCTTACCGTGTG      |
| <b>PSG5</b>         | CCTGTGAACCTAAGAGTGAGAAC | TCTCGTGACACTGGGTAGAA    |
| <b>BCL2L1</b>       | TCAGGCTGCTTGGGATAAAG    | AGGCTTCTGGAGGACATTTG    |
| <b>BIRC3</b>        | CAAGCCAGTTACCCTCATCTAC  | CTGAATGGTCTTCTCCAGGTTC  |
| <b>BCL2</b>         | GCCAGGGTCAGAGTTAAATAGAG | GCCTCTCTTGCGGAGTATTT    |
| <b>MCL1</b>         | GTGAAGATGGTAGGGTGGAAAG  | TCGGCGGGTAATCAATTCTATG  |
| <b>CAT</b>          | CTGGAGCACAGCATCCAATA    | TCATTCAGCACGTTCCACATAGA |
| <b>SOD1</b>         | GGCAAAGGTGGAAATGAAGAAA  | CTCAGACTACATCCAAGGGAATG |
| <b>PRDX4</b>        | GTGGATGAGACACTACGTTTGG  | CCAGCTGGATCTGGGATTATTG  |
| <b>PRDX6</b>        | CCAACCATCCCTGAAGAAGAA   | GGTGTGTAGCGGAGGTATTT    |
| <b>GAPDH</b>        | GGTGTGAACCATGAGAAGTATGA | GAGTCCTTCCACGATACCAAAG  |

**Table S2. List of antibodies against human proteins used for the Western blots.**

| <b>Antigen</b>             | <b>Catalog No.</b> | <b>IgG Type</b> | <b>Source</b>         |
|----------------------------|--------------------|-----------------|-----------------------|
| <b>GREM1</b>               | <b>ab140010</b>    | <b>Rabbit</b>   | <b>Abcam</b>          |
| <b>p16<sup>INK4A</sup></b> | <b>92803</b>       | <b>Rabbit</b>   | <b>Cell signaling</b> |
| <b>p21<sup>CIP</sup></b>   | <b>2947</b>        | <b>Rabbit</b>   | <b>Cell signaling</b> |
| <b>BCL-2</b>               | <b>2870</b>        | <b>Rabbit</b>   | <b>Cell signaling</b> |
| <b>BCL2L1</b>              | <b>2764</b>        | <b>Rabbit</b>   | <b>Cell signaling</b> |
| <b>SOD1</b>                | <b>SC271014</b>    |                 | <b>Santa Cruz</b>     |
| <b>Catalase</b>            | <b>SC50508</b>     | <b>Rabbit</b>   | <b>Santa Cruz</b>     |
| <b>ERK1/2</b>              | <b>SC135900</b>    | <b>Mouse</b>    | <b>Santa Cruz</b>     |
| <b>Phospho-ERK1/2</b>      | <b>9154</b>        | <b>Rabbit</b>   | <b>Cell signaling</b> |
| <b>NRF-2</b>               | <b>ab62352</b>     | <b>Rabbit</b>   | <b>Abcam</b>          |
| <b>Phospho-NRF-2</b>       | <b>ab76026</b>     | <b>Rabbit</b>   | <b>Abcam</b>          |
| <b>GAPDH</b>               | <b>2118</b>        | <b>Rabbit</b>   | <b>Cell signaling</b> |
